# Supplementary material
Source: publisher figshare collection journal article supplement (https://acs.figshare.com/ndownloader/files/4058662)
Supplement: Supplementary file 1 [file 4058662]

# In-Situ Observation of Plasmon Tuning in a Single Gold Nanoparticle During Controlled Melting

-

## Supporting Information

Alexander Kuhlicke<sup>\*1</sup>, Stefan Schietinger<sup>1</sup>, Christian Matyssek<sup>2</sup>, Kurt Busch<sup>2,3</sup>, and Oliver Benson<sup>1</sup>

<sup>1</sup>Humboldt-Universität zu Berlin, Institut für Physik, AG Nanooptik,  
Newtonstr. 15, D-12489 Berlin, Germany

<sup>2</sup>Humboldt-Universität zu Berlin, Institut für Physik,  
AG Theoretische Optik & Photonik, Newtonstr. 15, D-12489 Berlin,  
Germany

<sup>3</sup>Max-Born-Institut, Max-Born-Str. 2A, D-12489 Berlin, Germany

### Details on the simulation results

The simulation results shown in Fig. 5 were obtained using the Discontinuous Galerkin Time-Domain method [1, 2]. A mesh consisting of third order tetrahedral elements was used. For the spherical particle, we used a diameter of 80 nm, which is a typical value observed in the experiment. For the transformed particles, typical heights measured are around 110 nm. Assuming volume conservation and a prolate spheroidal shape, we arrive at short half-axes of 34 nm. To accurately model the particle geometry, elements sizes down to 5 nm were used, the entire setup consists of roughly 40.000 elements.

The permittivity of the gold particle was approximated by an analytical fit to measured values [3]. We used one Drude term plus three Lorentz terms

$$\varepsilon(\omega) = \varepsilon_{\infty} - \frac{\omega_D^2}{\omega(\omega + i\gamma_D)} + \sum_{i=1}^3 \frac{\Delta_i \Omega_i^2}{\Omega_i^2 - i\Gamma\omega - \omega^2} \quad (1)$$

which gives a reasonably accurate approximation. For the substrate, we assumed a permittivity of 2.32.

---

<sup>\*</sup>kuhlicke@physik.hu-berlin.de

|           | $\varepsilon_\infty$ | $\omega_D$<br>(s <sup>-1</sup> ) | $\gamma_D$<br>(s <sup>-1</sup> ) |
|-----------|----------------------|----------------------------------|----------------------------------|
| Drude     | 6.40                 | $1.37 \cdot 10^{16}$             | $1.16 \cdot 10^{14}$             |
|           | $\Delta_i$           | $\Omega_i$<br>(s <sup>-1</sup> ) | $\Gamma_i$<br>(s <sup>-1</sup> ) |
| Lorentz 1 | $1.51 \cdot 10^{15}$ | $4.42 \cdot 10^{15}$             | $1.54 \cdot 10^{15}$             |
| Lorentz 2 | $1.02 \cdot 10^{15}$ | $5.56 \cdot 10^{15}$             | $1.83 \cdot 10^{15}$             |
| Lorentz 3 | $0.80 \cdot 10^{15}$ | $6.72 \cdot 10^{15}$             | $1.79 \cdot 10^{15}$             |

Table 1: Parameters for the Drude-Lorentz model used in the simulations

The particle was excited with a plane wave with a Gaussian profile in time, which is incident under an angle of 7° relative to the substrate, just as in the experiment.

## References

- [1] Busch, K.; König, M.; Niegemann, J. *Laser Photonics Rev.* **2011**, *5*, 773–809.
- [2] Niegemann, J.; König, M.; Stannigel, K.; Busch, K. *Photonics and Nanostructures - Fundamentals and Applications* **2009**, *7*, 2–11.
- [3] Johnson, P. B.; Christy, R. W. *Phys. Rev. B* **1972**, *6*, 4370–4379.
